# Supplementary material for: Primary and Recall Immune Responses to SARS-CoV-2 in Breakthrough Infection
Source: MDPI journal article supplement (doi:10.3390/vaccines11111705), 2023-11-09
Supplement: s1 [file s1]

## Supplementary Materials

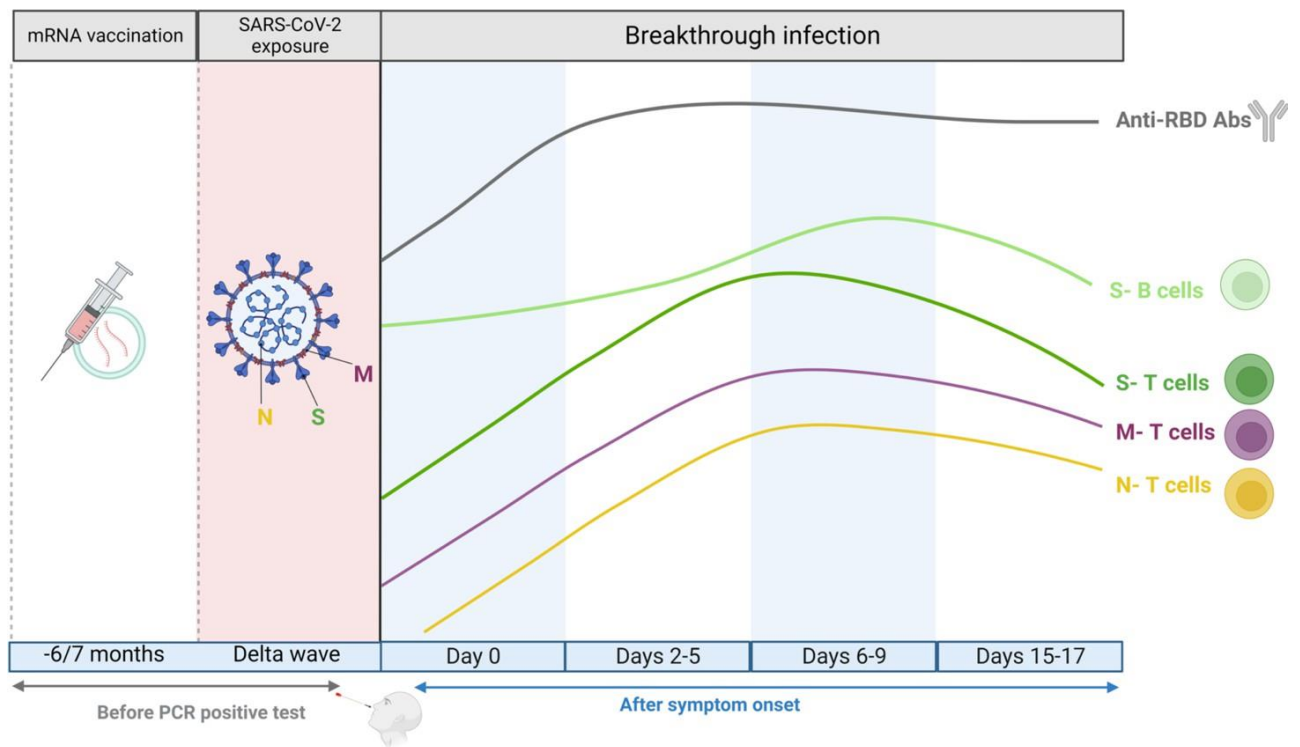

**Figure S1.** Study Design. Fifteen health care workers previously vaccinated with 2 doses of mRNA vaccine and with breakthrough infections, were followed longitudinally from day 0 (first positive PCR-based test) to negativization. The kinetics of the humoral and cellular response were assessed by grouping the longitudinal samples in four different time frames: 0, 2–5, 6–9 and 15–17 days. (S-: Spike, M-: Membrane, N-:Nucleocapsid, RBD-: Receptor Binding Domain).

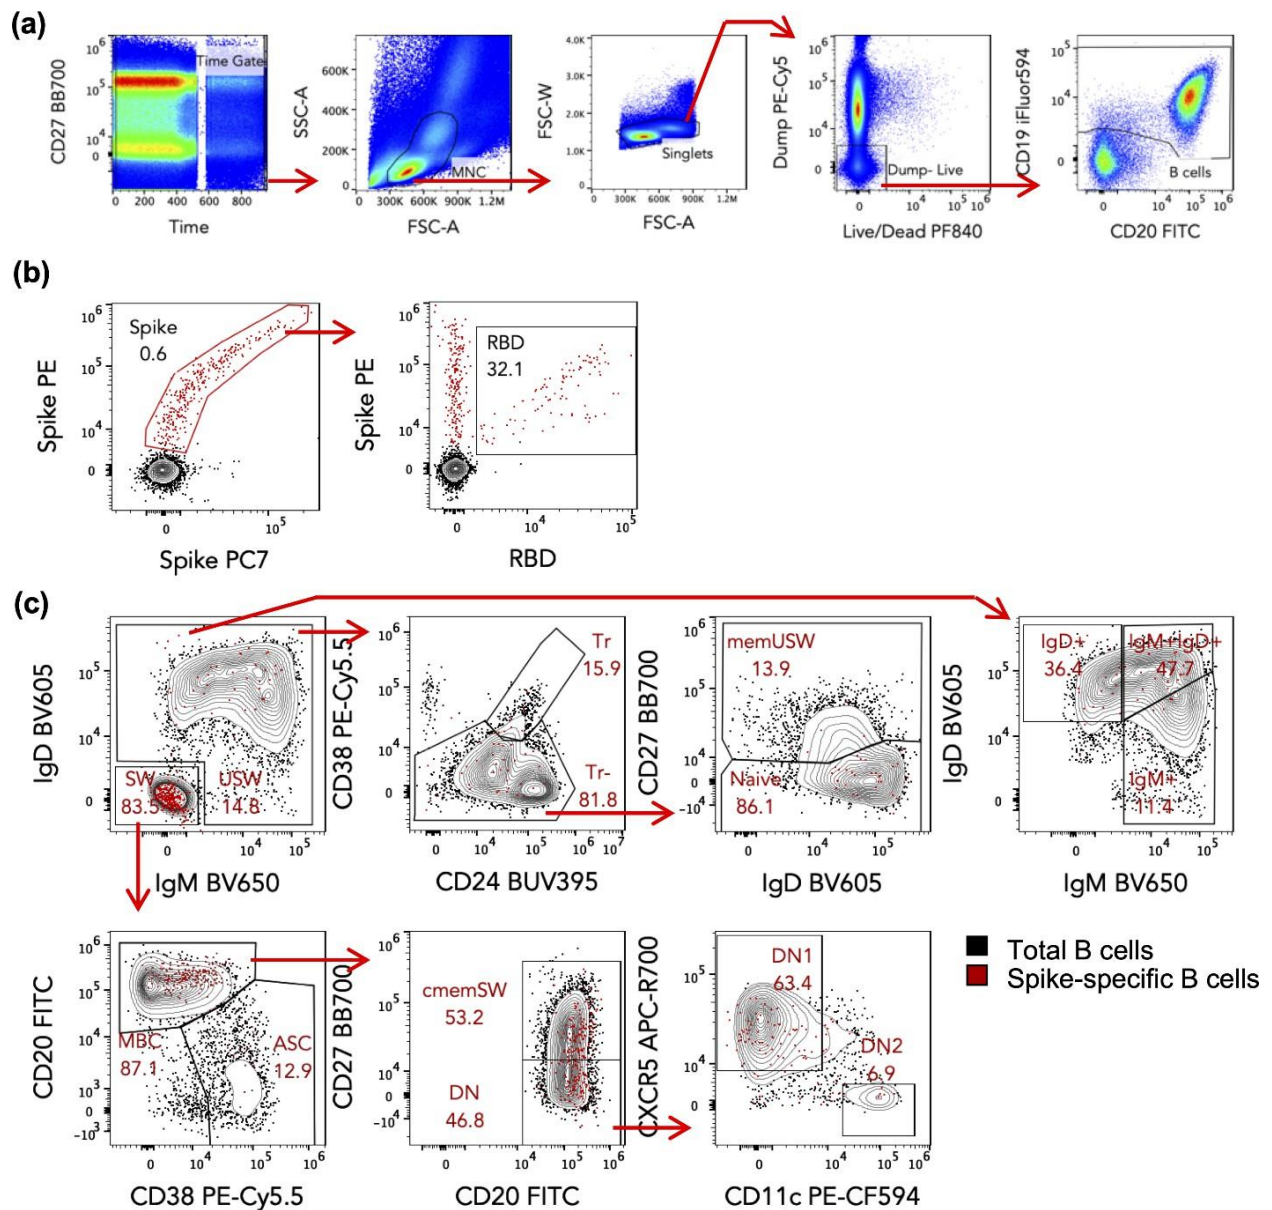

**Figure S2.** Gating strategy of antigen-specific B cell subpopulations. **(a)** Gating strategy for the identification of CD20+ CD19+ B cells on viable (Live/Dead) and single lymphocytes. Monocytes, neutrophils, platelets, red blood and T cells are removed by exclusion of CD14+, CD16+, CD41+, CD235a+ and CD3+ cells. **(b)** Gating of S- and RBD-specific B cells. **(c)** Sequential gating and characterization of S-specific B cells (red dots), overlaid on total CD19+ B cells (grey contour plots with outliers). Red numbers in plots under subset names indicate the frequency of S-specific B cells. (RBD: Receptor Binding Domain, ASC: Antibody Secreting Cells, cmemSW: classical memory switched, DN1: double negative 1, DN2: double negative 2, Tr: transitional, USWmem: unswitched memory).

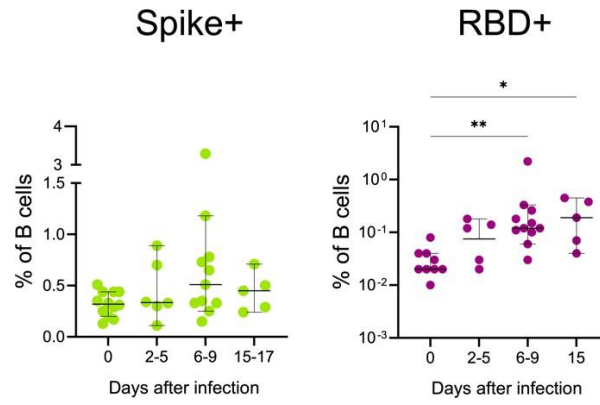

**Figure S3.** Frequencies of Spike and RBD-specific B cells. Values were compared by non parametric repeated measures Kruskal-Wallis and corrected for Dunn's multiple comparison tests; \*  $p < 0.05$ ; \*\*  $p < 0.01$ . (RBD: Receptor Binding Domain).

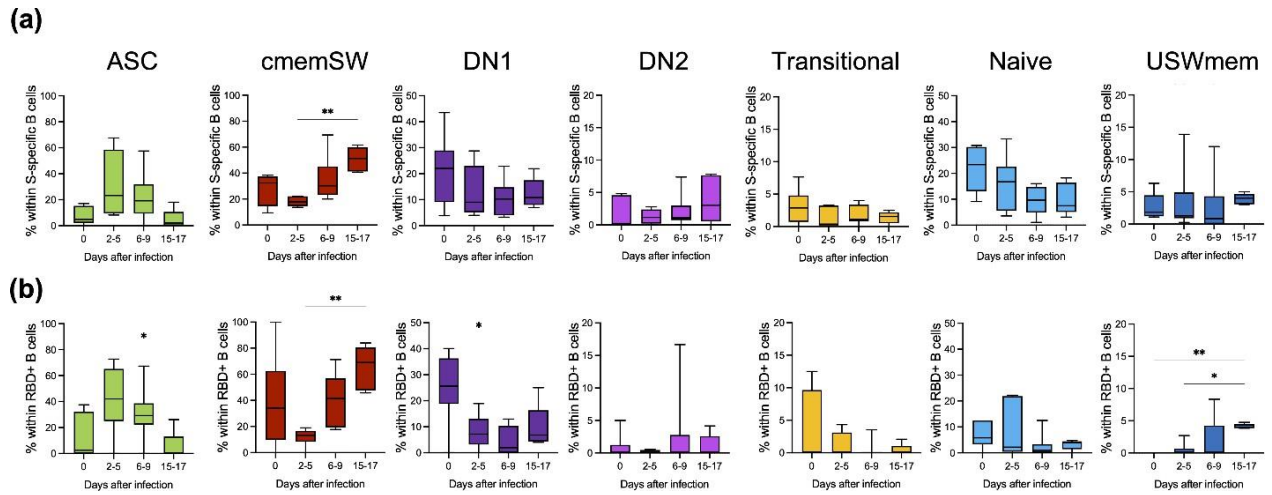

**Figure S4.** Frequency of different B cell subpopulations. **(a)** Frequency of different B cell subpopulations within S-specific B cells (day 0  $n = 6$ ; 2–5 days  $n = 6$ ; 6–9 days  $n = 11$ ; 15–17 days  $n = 5$ ). Values were compared by nonparametric repeated measures Kruskal-Wallis and corrected for Dunn's multiple comparison tests; \*\*  $p < 0.005$ ; **(b)** Frequency of different B cell subpopulations within RBD-specific B cells (day 0  $n = 6$ ; 2–5 days  $n = 6$ ; 6–9 days  $n = 11$ ; 15–17 days  $n = 5$ ). Values were compared by nonparametric repeated measures Kruskal-Wallis and corrected for Dunn's multiple comparison tests; \*  $p < 0.05$ ; \*\*  $p < 0.01$ . (RBD: Receptor Binding Domain, ASC: Antibody Secreting Cells, cmemSW: classical memory switched, DN1: double negative 1, DN2: double negative 2, Tr: transitional, USWmem: unswitched memory).

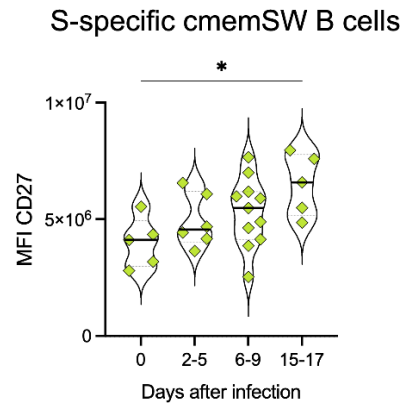

**Figure S5.** MFI of CD27. MFI of CD27 within S-cmemSW B cell subset; Values were compared by nonparametric repeated measures Kruskal-Wallis and corrected for Dunn's multiple comparison tests; \*  $p < 0.05$ . (S-: Spike, cmemSW: classical memory switched).

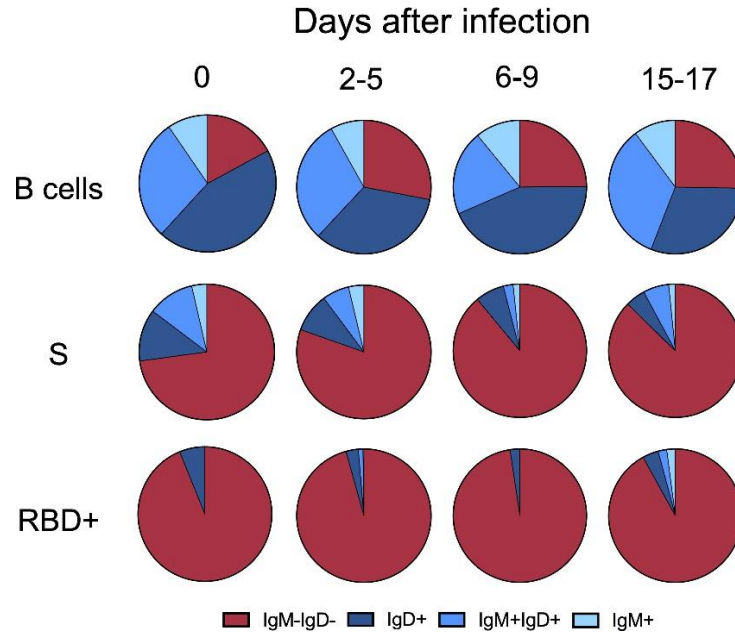

**Figure S6.** Frequency of different Ig isotype expressed on surface. Frequency of IgM-IgD-, IgD+ single positive, IgM+ single positive and IgM+IgD+ within total B cells, S- and RBD-specific B cells (day 0  $n = 6$ ; 2–5 days  $n = 6$ ; 6–9 days  $n = 11$ ; 15–17  $n = 5$ ). (S-: Spike, RBD-: Receptor Binding Domain).

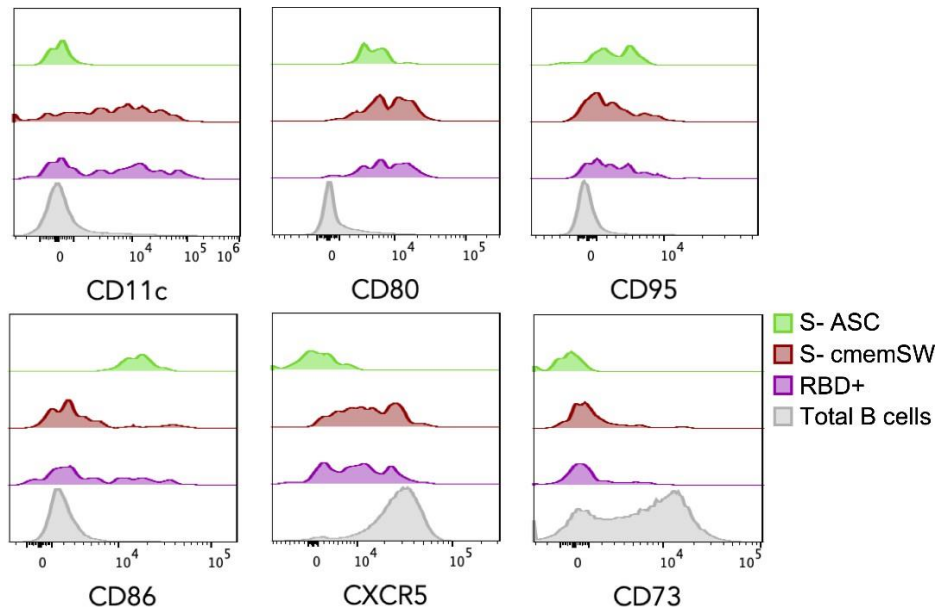

**Figure S7.** CD11c, CD80, CD95, CD86, CXCR5 and CD73 expression in S-specific subpopulations and in total B cells. Overlaid Median Fluorescence Intensity (MFI) of each marker is represented in S- specific subpopulations (S- ASCs and S- cmemSW), RBD+ and total B cells, identified by different colours as shown in the legend. (S-: Spike, RBD: Receptor Binding Domain, ASC: Antibody Secreting Cells, cmemSW: classical memory switched).



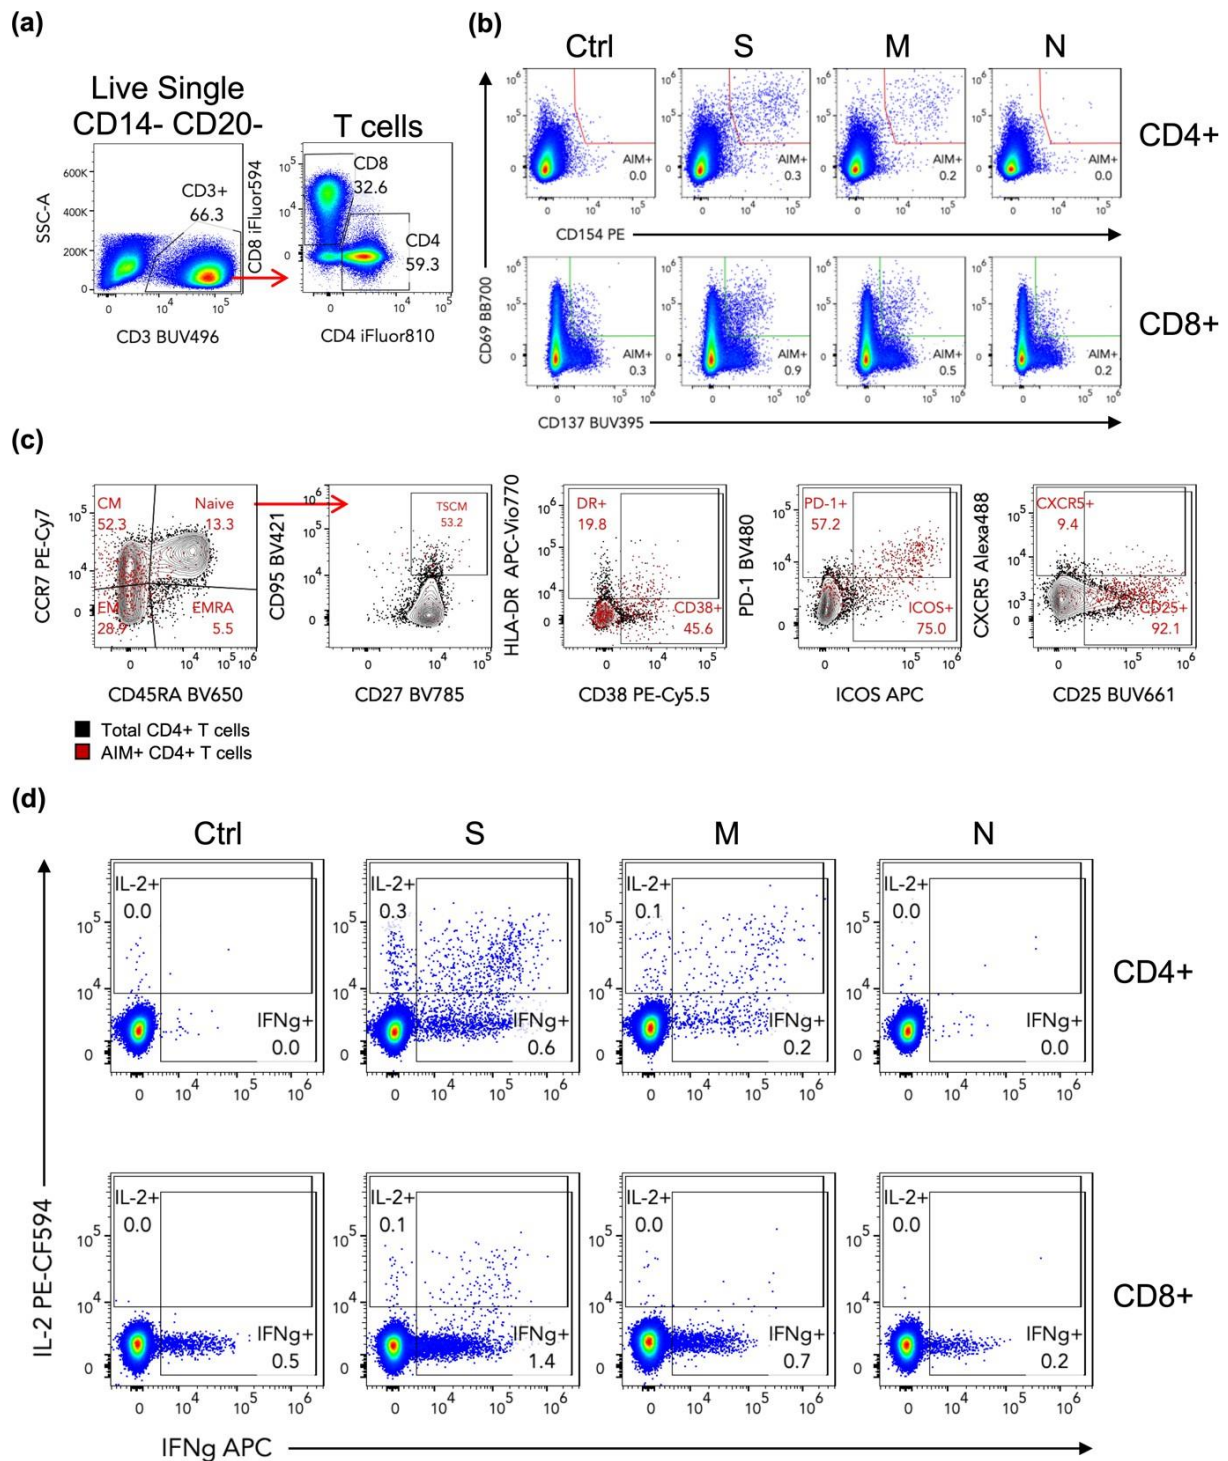

**Figure S8.** Gating strategy of AIM+ T cell subpopulations. **(a)** Conventional gating strategy for the identification of CD3+ CD4+ / CD8+ T cells on viable (Live/Dead-) and single lymphocytes. Monocytes and B cells are removed by exclusion of CD14+ and CD20+ cells. **(b)** Gating and characterization of AIM+ CD4+ and of AIM+ CD8+ T cells in unstimulated (Ctrl) and stimulated (S, M and N) conditions. **(c)** Representative gating and characterization of activation/homing markers (HLA-DR, CD38, PD-1, ICOS, CXCR5, CD25, CCR7 and CD45RA) in AIM+ CD4+ T cells. Red dots represent AIM+ cells overlaid on total CD4+ cells (grey contour plots with outliers). Numbers inside or adjacent to the gates indicate frequencies within AIM+ T cells. **(d)** IFN- $\gamma$  and IL-2+ production by both CD4+ and CD8+ T cells in unstimulated (Ctrl) and stimulated (S, M and N) conditions. Numbers inside or adjacent to the gates indicate frequencies within CD4+ or CD8+ T cells. (S-: Spike, M-: Membrane, N-: Nucleocapsid, AIM: Activation Induced Markers, TSCM: T Stem Cell Memory, EM: Effector Memory, CM: Central Memory, EMRA: terminally differentiated effector memory).



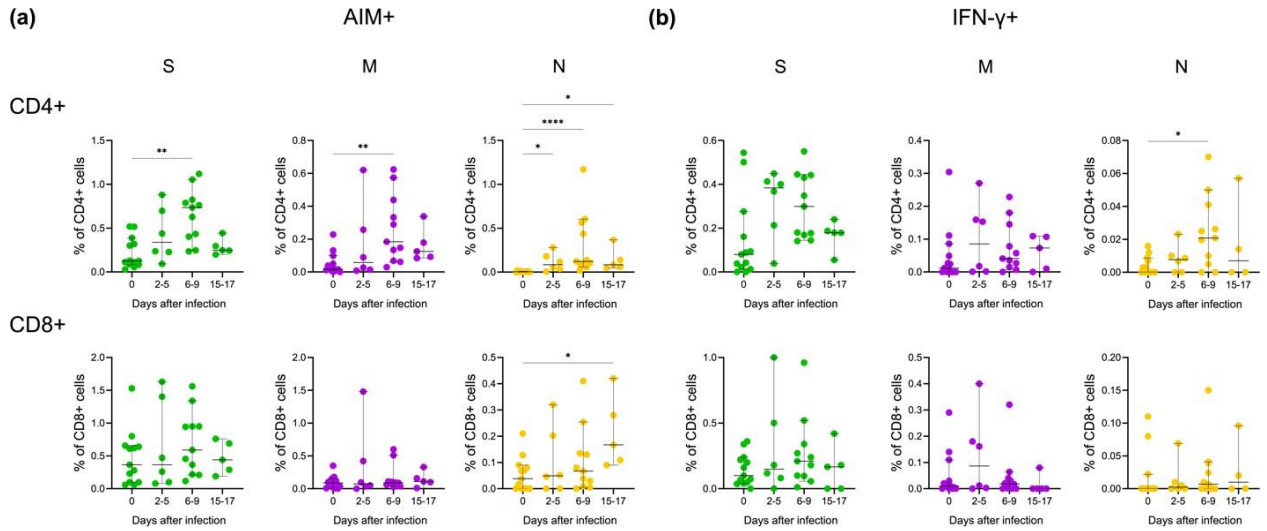

**Figure S9.** Frequencies of AIM+ T cells. **(a)** Frequencies of AIM+ CD4+ (top) or CD8+ (bottom) T cells specific for S, N, and M antigens. **(b)** Frequencies of IFN-γ+ CD4+ (top) or CD8+ (bottom) T cells specific for S, N, and M antigens. Values obtained at each time point for S-, M- and N-specific T cells were compared by non-parametric Kruskal-Wallis tests followed by Dunn's post hoc tests. \*  $p < 0.05$ ; \*\*\*\*  $p < 0.0001$ ; no symbol, not significant. (S: Spike, M: Membrane, N: Nucleocapsid, AIM: Activation Induced Markers)

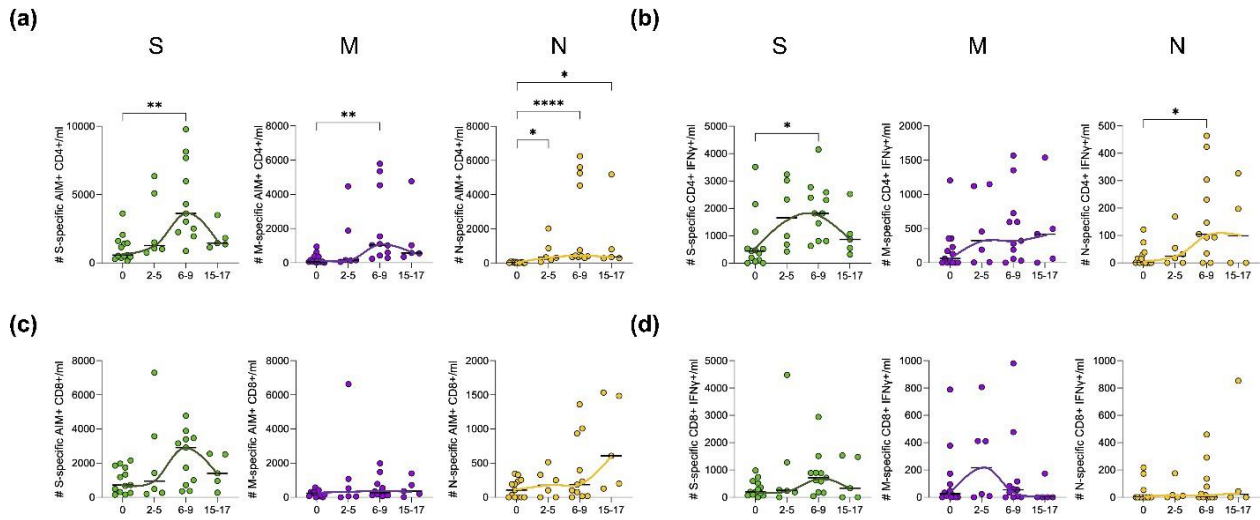

**Figure S10.** Kinetics of Spike-specific, membrane-specific and nucleocapsid-specific CD4+ and CD8+ T cells during breakthrough infection. Numbers of S-, M-, and N-specific CD4+ (A) and CD8+ (C) T cells and S-, M-, and N-specific CD4+ (B) and CD8+ (D) IFN $\gamma$  production. The curves connect the medians of the observations over time and are for illustrative purposes only. The non-parametric Kruskal- Wallis test followed by Dunn's post hoc tests was used to compare time points. \*  $p < 0.05$ ; \*\*\*  $p < 0.001$ , \*\*\*\*  $p < 0.0001$ ; no symbol, not significant. (S-: Spike, M-: Membrane, N-:Nucleocapsid, AIM: Activation Induced Markers).

**Table S1.** Donor characteristics.

| <b>Donor</b> | <b>Sex</b> | <b>Age</b> |
|--------------|------------|------------|
| R_01         | M          | 35         |
| R_02         | F          | 22         |
| R_03         | M          | 23         |
| R_04         | F          | 25         |
| R_05         | F          | 23         |
| R_06         | F          | 52         |
| R_07         | M          | 35         |
| R_08         | F          | 31         |
| R_09         | F          | 56         |
| R_10         | F          | 54         |
| R_11         | F          | 31         |
| R_12         | M          | 60         |
| R_13         | M          | 49         |
| R_14         | F          | 52         |
| R_15         | F          | 45         |

**Table S2.** Reagents for the detection and study of antigen-specific B cells.

| Target       | Fluorochrome    | Dilution | Clone        | Manufacturer |
|--------------|-----------------|----------|--------------|--------------|
| CD20         | FITC            | 1:200    | 2H7          | Bect.Dick.   |
| CD11c        | PE-CF594        | 1:250    | B-LY6        | Bect.Dick.   |
| CD27         | BB700           | 1:120    | M-T271       | Bect.Dick.   |
| Streptavidin | PE              | -        | -            | Miltenyi     |
| CD19         | iFluor594       | 1:30     | HI19A        | AAT Bioquest |
| CD3          | PE-Cy5          | 1:100    | UCHT1        | Coulter      |
| CD14         |                 | 1:100    | RMO52        | Coulter      |
| CD16         |                 | 1:100    | 3G8          | Bect.Dick.   |
| CD41a        |                 | 1:200    | HIP8         | Bect.Dick.   |
| CD235a       |                 | 1:500    | GA-R2 (HIR2) | Bect.Dick.   |
| CD38         | PE-Cy5.5        | 1:100    | LS198-4-3    | Coulter      |
| Streptavidin | PE-Vio770       | -        | -            | Miltenyi     |
| CD73         | APC             | 1:100    | AD2          | Miltenyi     |
| CXCR5        | APC-R700        | 1:60     | RF8B2        | Bect.Dick.   |
| CD80         | BV421           | 1:30     | L307.4       | Bect.Dick.   |
| IgD          | BV605           | 1:50     | IA6-2        | Bect.Dick.   |
| IgM          | BV650           | 1:120    | G20-127      | Bect.Dick.   |
| CD95         | BV786           | 1:30     | DX2          | Bect.Dick.   |
| CD24         | BUV395          | 1:60     | ML5          | Bect.Dick.   |
| CD86         | BUV496          | 1:180    | 2331 (FUN-1) | Bect.Dick.   |
| Streptavidin | iFluor810       | -        | -            | AAT Bioquest |
| Live Dead    | Promo Fluor 840 | 1:10,000 | NA           | Promokine    |

**Table S3.** Reagents for AIM assay.

| Target    | Fluorochrome    | Dilution | Clone      | Manufacturer |
|-----------|-----------------|----------|------------|--------------|
| CD3       | BUV496          | 1:50     | UCHT1      | Bect.Dick.   |
| CD4       | iFluor810       | 1:50     | RPA-T4     | AAT Bioquest |
| CD8       | iFluor594       | 1:150    | SK1        | AAT Bioquest |
| CD14/CD20 | PE-Cy5          | 1:50     | RM052/B9E9 | Coulter      |
| CD25      | BUV661          | 1:30     | 2A3        | Bect. Dick.  |
| CD27      | BV785           | 1:30     | 0323       | Bect. Dick.  |
| CD38      | PE-Cy5.5        | 1:100    | LS198-4-3  | Coulter      |
| CD45RA    | BV650           | 1:200    | HI100      | Bect. Dick.  |
| CD69      | BB700           | 1:100    | FN50       | Bect. Dick.  |
| CD95      | BV421           | 1:30     | DX2        | Sony         |
| CD137     | BUV395          | 1:30     | 4B4-1      | Bect. Dick.  |
| CD154     | PE              | 1:30     | 24-31      | eBioscience  |
| CXCR5     | Alexa488        | 1:50     | RF8B2      | Bect. Dick.  |
| CCR7      | PE-Cy7          | 1:30     | G043H7     | SONY         |
| ICOS      | APC             | 1:100    | ISA-3      | Coulter      |
| PD-1      | BV480           | 1:30     | EH12.1     | Bect. Dick.  |
| HLA-DR    | APC-Vio770      | 1:120    | REA805     | Miltenyi     |
| Live Dead | Promo Fluor 840 | 1:10,000 | NA         | Promokine    |

**Table S4.** Reagents for Absolute counts.

| Target | Fluorochrome | Dilution | Clone    | Manufacturer |
|--------|--------------|----------|----------|--------------|
| CD3    | APC-Vio770   | 1:120    | REA613   | Miltenyi     |
| CD4    | BV650        | 1:100    | SK3      | Bect.Dick.   |
| CD8    | APC          | 1:100    | BW135/80 | Miltenyi     |
| CD19   | PE-Cy7       | 1:100    | J3-119   | Coulter      |
| CD45   | FITC         | 1:50     | KC56     | Coulter      |

**Table S5.** Reagents for intracellular staining.

| Target        | Fluorochrome    | Dilution | Clone   | Manufacturer |
|---------------|-----------------|----------|---------|--------------|
| CD3           | BUV496          | 1:50     | UCHT1   | Bect.Dick.   |
| CD4           | iFluor810       | 1:50     | RPA-T4  | AAT Bioquest |
| CD8           | IFluor594       | 1:150    | SK1     | AAT Bioquest |
| CD14          | BUV395          | 1:50     | MφP9    | Bect.Dick.   |
| IL-2          | PE-CF594        | 1:50     | 5344.11 | Bect.Dick.   |
| IFN- $\gamma$ | APC             | 1:100    | B27     | Bect.Dick.   |
| Live Dead     | Promo Fluor 840 | 1:10,000 | NA      | Promokine    |
